# Supplementary material
Source: publisher figshare collection journal article supplement (https://acs.figshare.com/ndownloader/files/10244601)
Supplement: Supplementary file 1 [file 10244601]

## Supporting Information

### **Phenylboronic acid templated gold nanocluster for mucin detection using a smartphone based device and targeted cancer cell theranostics**

*Deepanjalee Dutta,<sup>1</sup> Sunil Kumar Sailapu,<sup>1</sup> Arun Chattopadhyay\*<sup>1,2</sup> and Siddhartha Sankar Ghosh\*<sup>1,3</sup>*

Centre for Nanotechnology,<sup>1</sup> Department of Chemistry,<sup>2</sup> Department of Biosciences and  
Bioengineering<sup>3</sup>

Indian Institute of Technology Guwahati, Guwahati -781039, India

Email ID: arun@iitg.ernet.in, sghosh@iitg.ernet.in

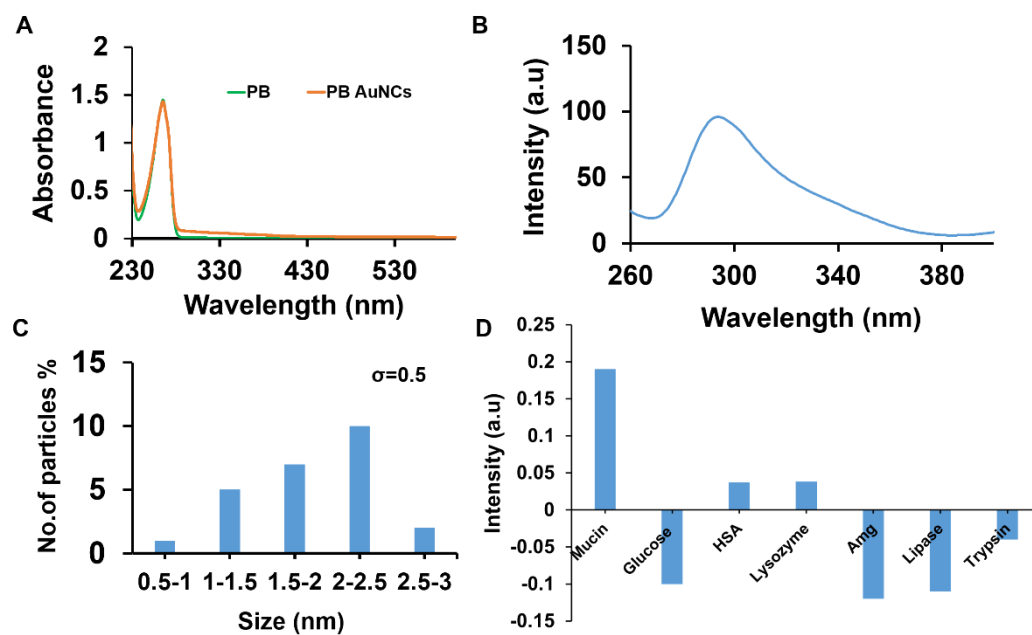

**Figure S1.** (A) UV-Visible spectrum of PB, PB-Au NCs. (B) Excitation spectrum of PB-Au NCs. (C) Particle size distribution of PB-Au NCs. (D) Comparison of effect of various interfering analytes with respect to mucin towards fluorescence of PB-Au NCs.

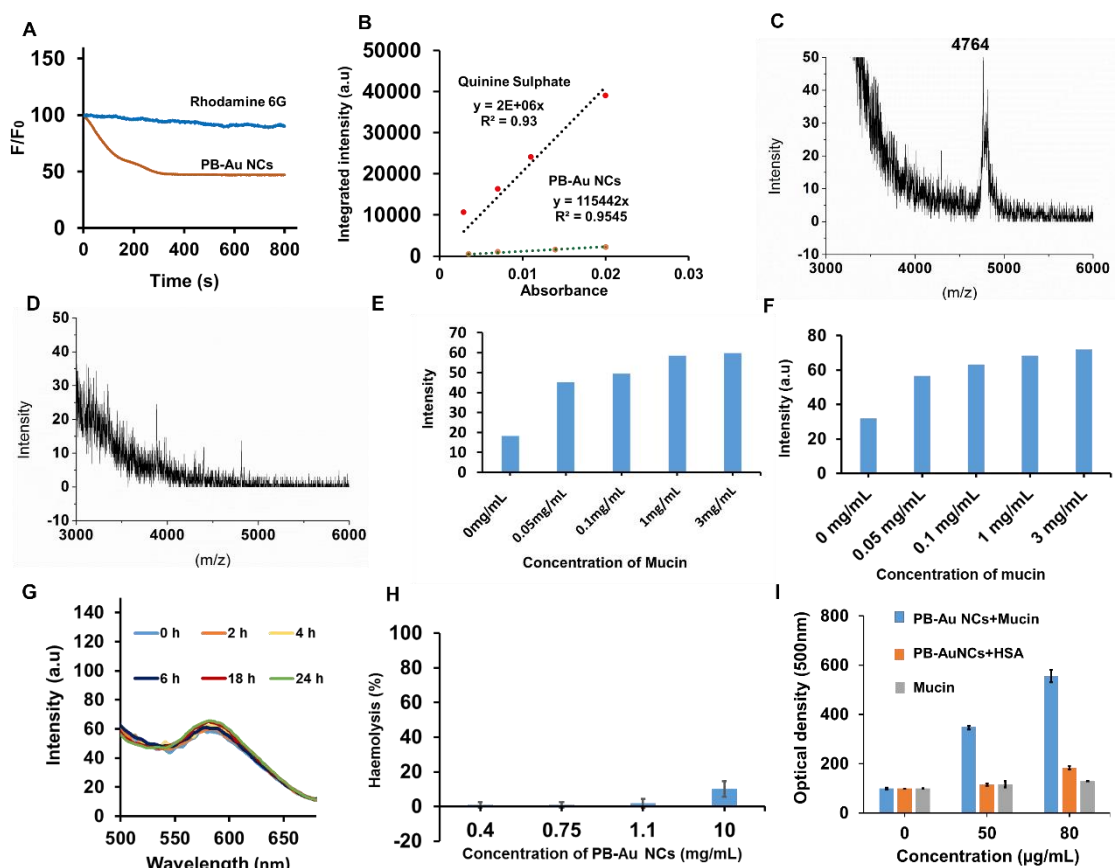

**Figure S2.** (A-C) Photo stability, quantum yield, MALDI-TOF of PB-Au NCs. (D-F) MALDI-TOF of PB, luminescence intensity of PB-Au NCs in presence of mucin in FBS, luminescence intensity of PB-Au NCs in presence of mucin in human plasma. (G) Stability of PB-Au NCs in human plasma. (H) Hemolysis assay of PB-Au NCs. (I) Change in optical density of PB-Au NCs suspension caused by addition of mucin or HSA.

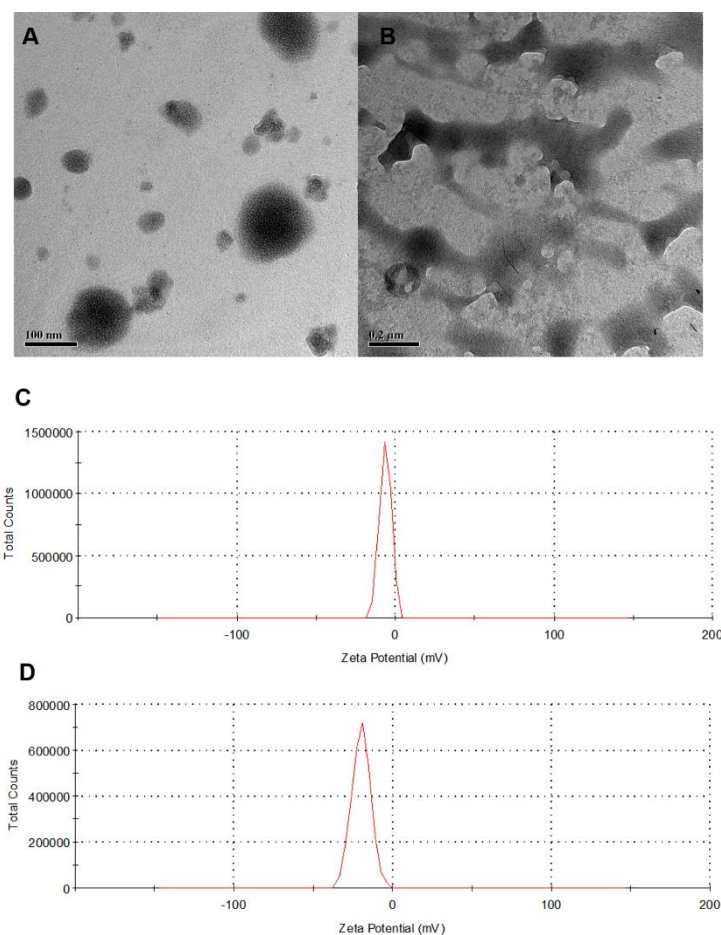

**Figure S3.** (A, B) TEM of PB-Au NCs before and after addition of mucin (showing aggregation) respectively. (C, D) Zeta potential of PB-Au NCs and mucin respectively.

**A**

Single image view with  
cropping options,  
represented in different  
color spaces with related  
information

Calibration and  
estimation of samples  
from images

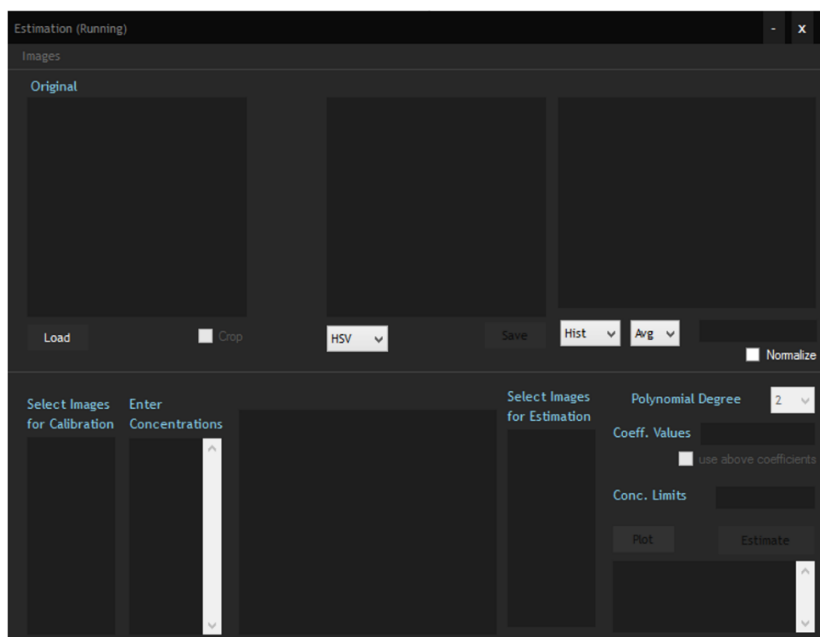

**B**

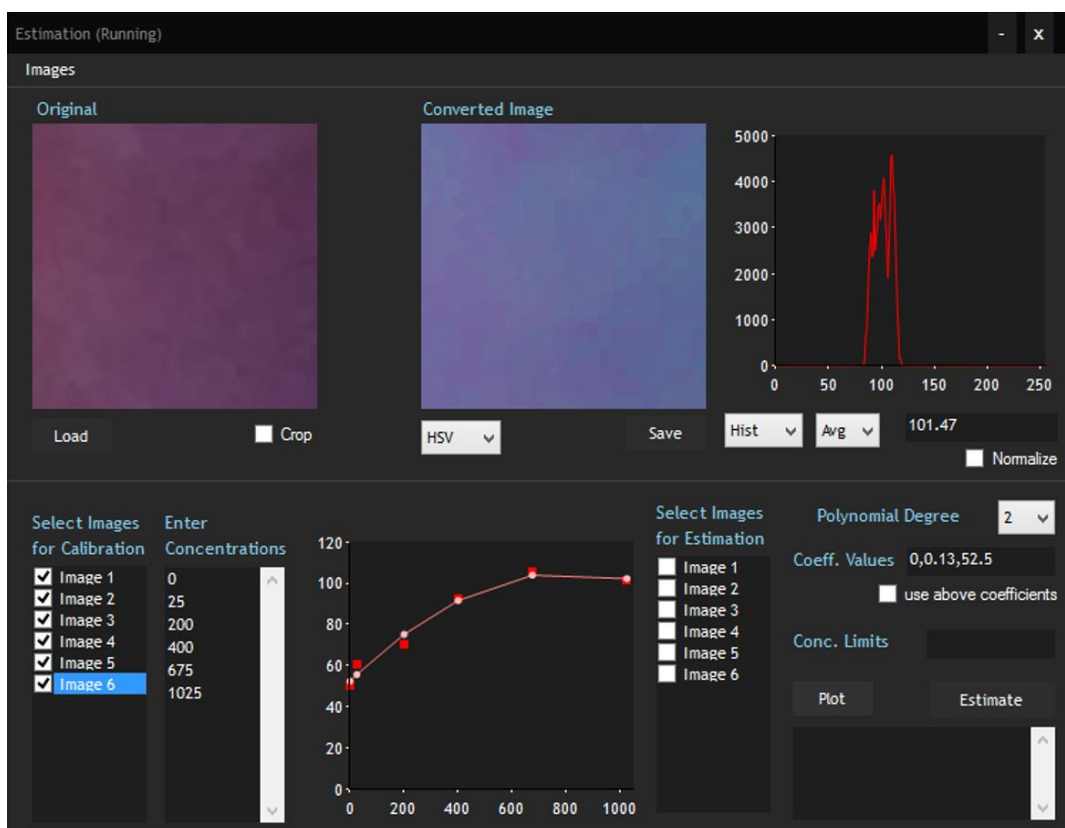

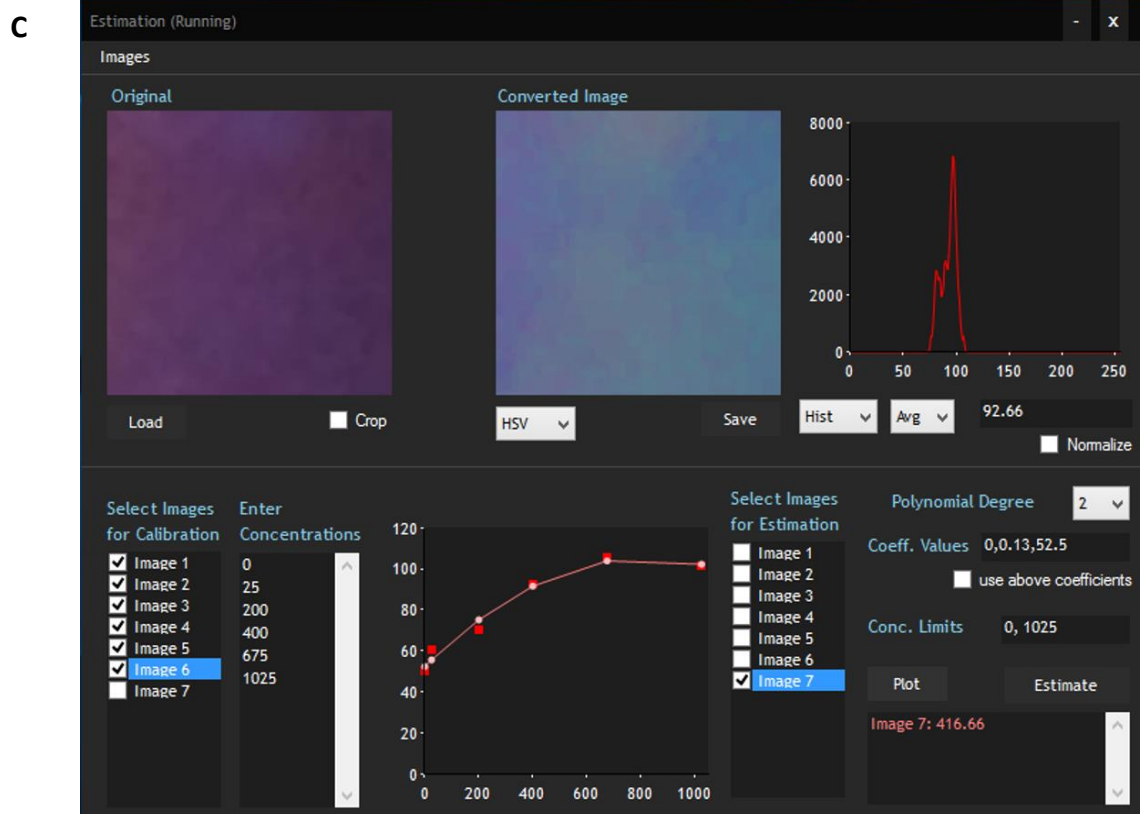

**Figure S4.** (A-C) Snapshots of the work flow of the custom designed application.

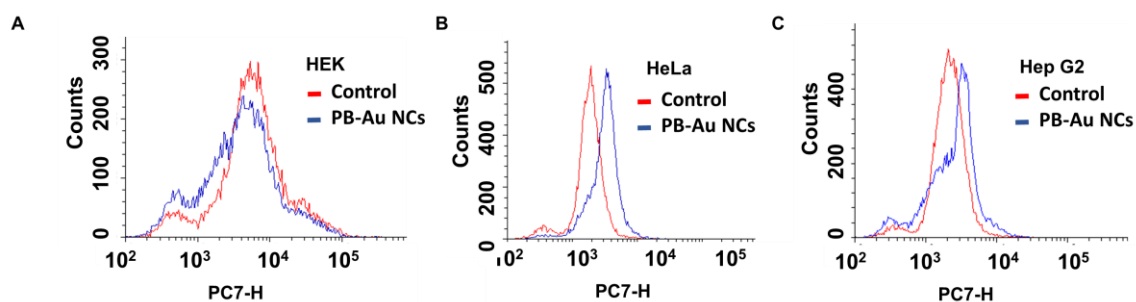

**Figure S5.** (A-C) Uptake of PB-Au NCs by HEK, HeLa, Hep G2 cells studied using FACS by tracking the fluorescence of PB-Au NCs.

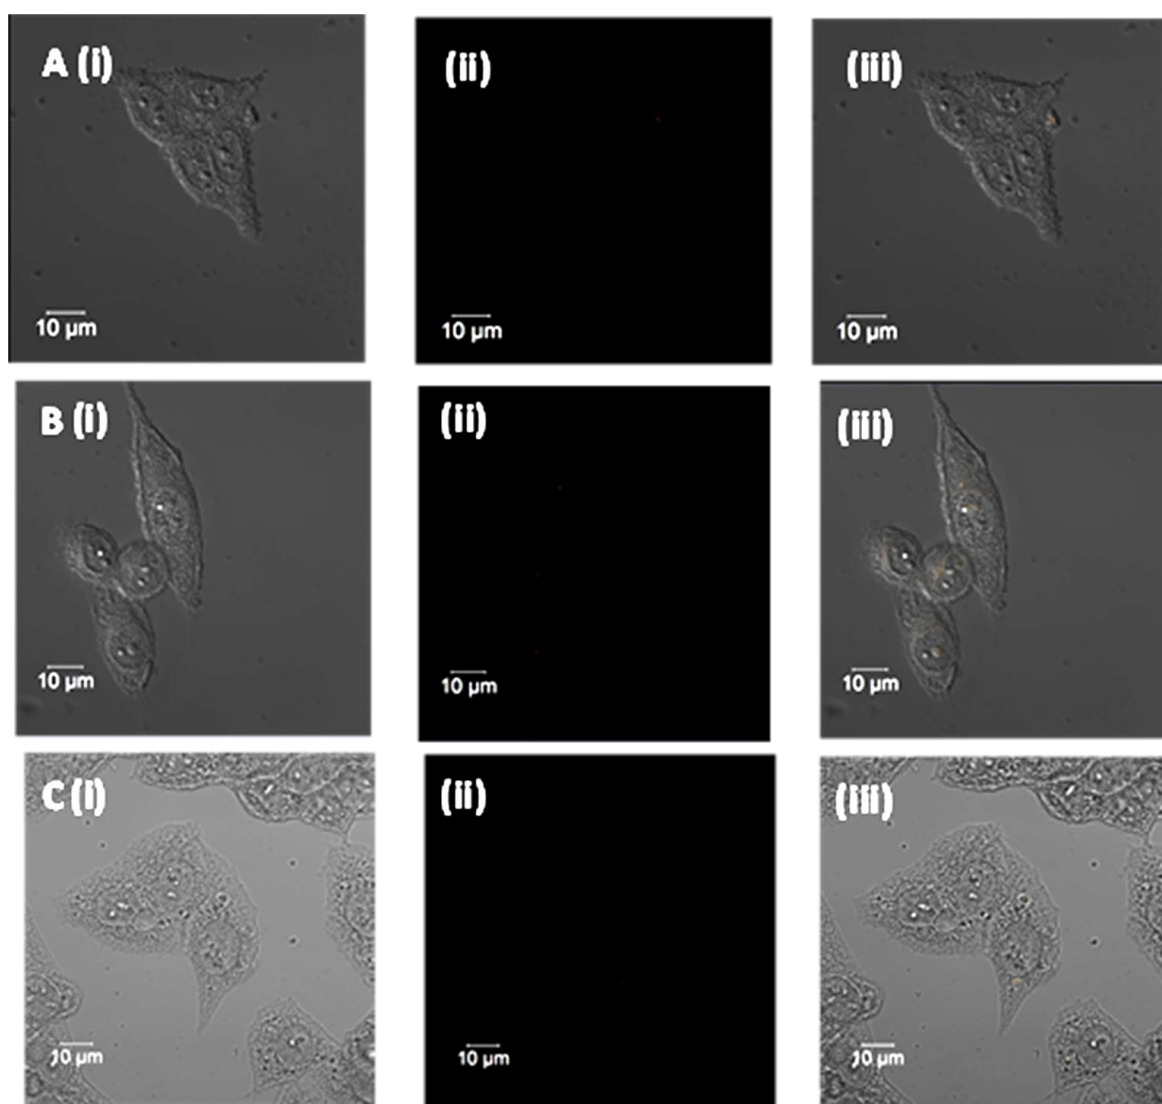

**Figure S6.** (A) (i-iii) Bright field image, fluorescent image and merged image of control HEK cells. (B) (i-iii) Bright field image, fluorescent image and merged image of control HeLa cells. (C) (i-iii) Bright field image, fluorescent image and merged image of control Hep G2 cells.

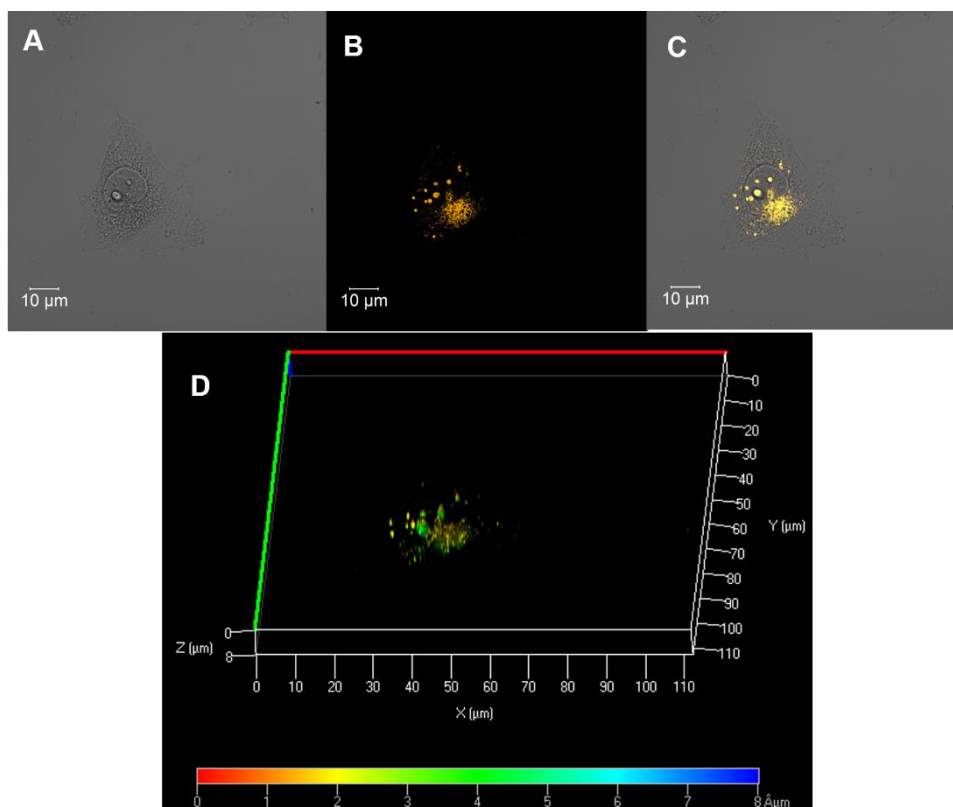

**Figure S7.** (A-C) Bright field image, fluorescent image and merged image of HeLa cells treated with PB-Au NCs. (D) Depth projection of confocal microscopy image showing internalization of PB-Au NCs inside HeLa cell.

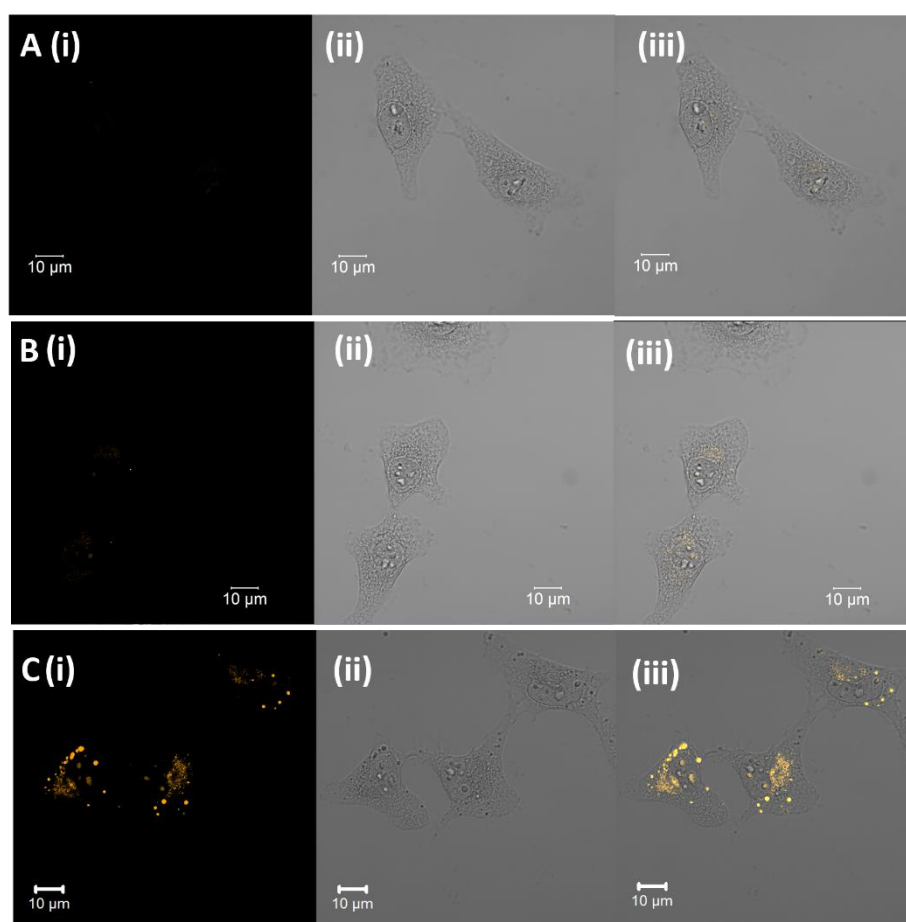

**Figure S8.** (A) (i-iii) Fluorescent image, bright field image and merged image of control HeLa cells. (B) (i-iii) Fluorescent image, bright field image and merged image of HeLa cells that were first exposed to free PB and then treated with PB-Au NCs. (C) (i-iii) Fluorescent image, bright field image and merged image of HeLa cells treated with PB-Au NCs.

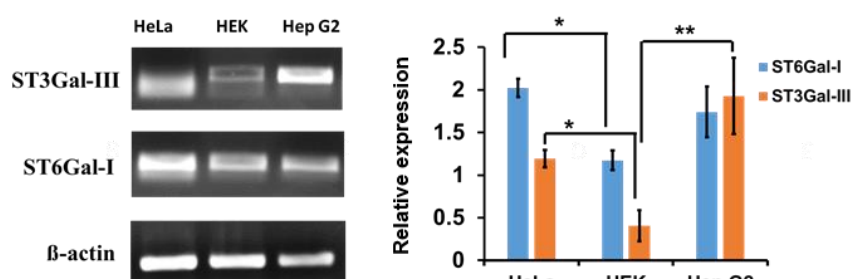

**Figure S9.** Semi quantitative RT-PCR of genes ST3GAL-III, ST6GAL-I, β-actin expressed in HeLa, HEK, Hep G2 cell lines.

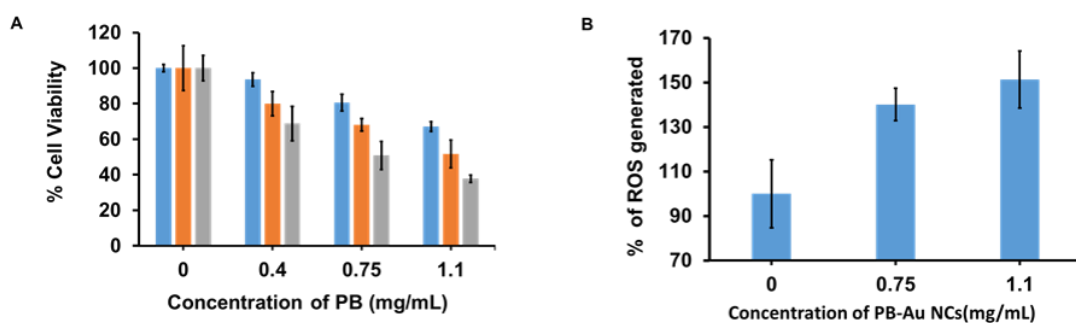

**Figure S10.** (A) Cell viability assay of HeLa cells treated with free PB. (B) ROS generation profile of DCFH-DA stained HeLa cells treated with PB-Au NCs in comparison to control HeLa cells.

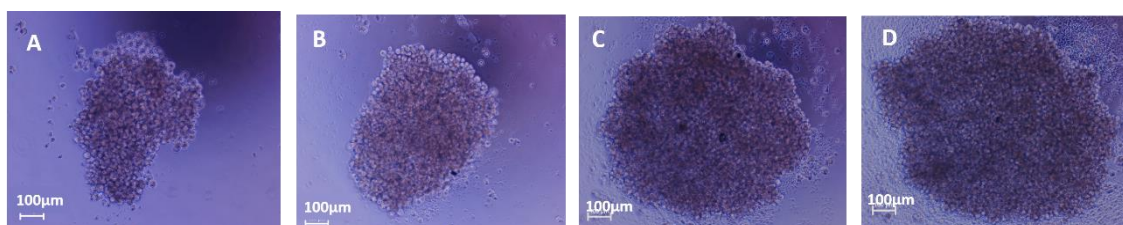

**Figure S11.** (A-D) Increasing diameter of HeLa spheroids generated by seeding of increasing number of cells (2000 cells/well, 5000 cells/well, 10000 cells/well, 20000 cells/well).

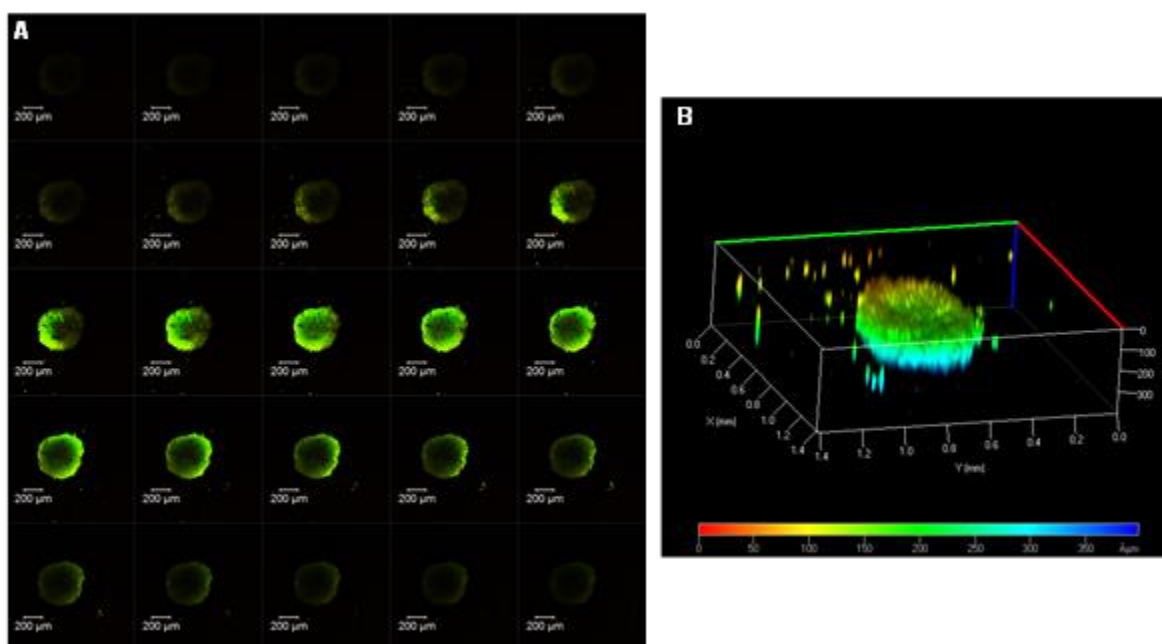

**Figure S12.** (A) Z-stack of confocal microscopy image of HeLa spheroid stained with acridine orange. (B) Depth projection of confocal microscopy image.

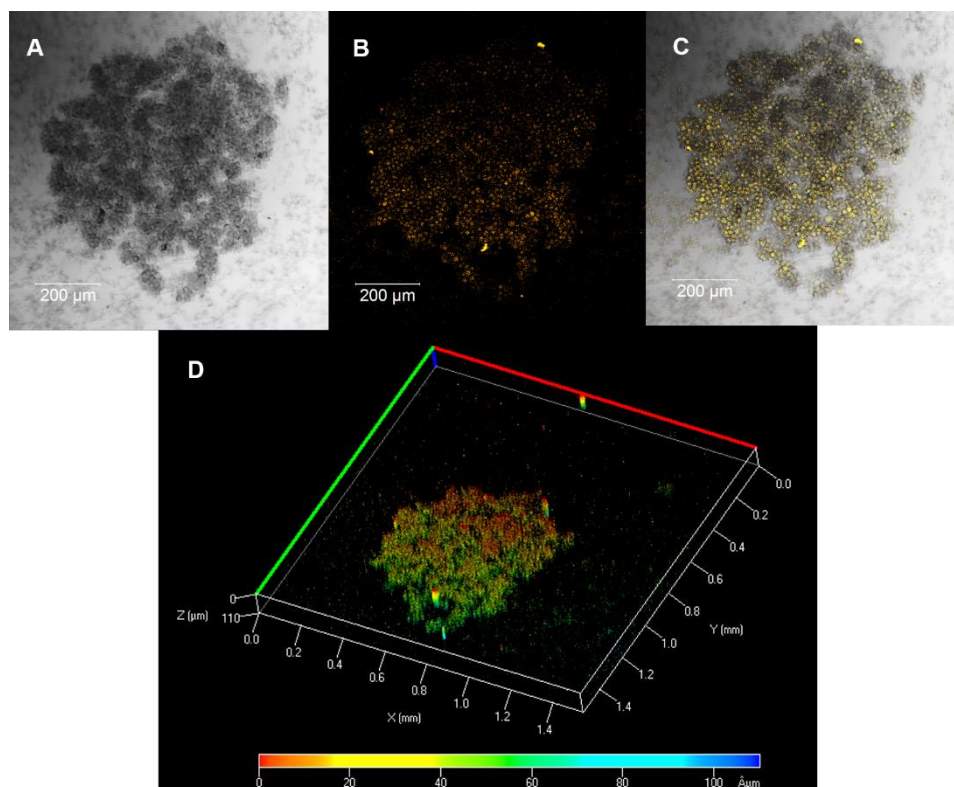

**Figure S13.** (A-C) Bright field image, fluorescent image, and merged image of HeLa spheroid treated with PB-Au NCs (6 mg/mL for 4 hours). (D) Depth projection of confocal microscopy image of HeLa spheroid treated with PB-Au NCs (6 mg/mL for 4 h).

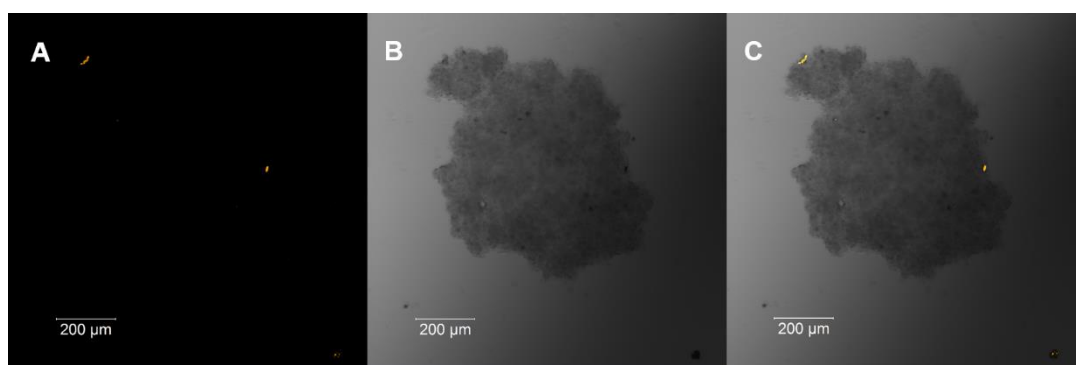

**Figure S14.** (A-C) Bright field image, fluorescent image, and merged image of control HeLa spheroid.

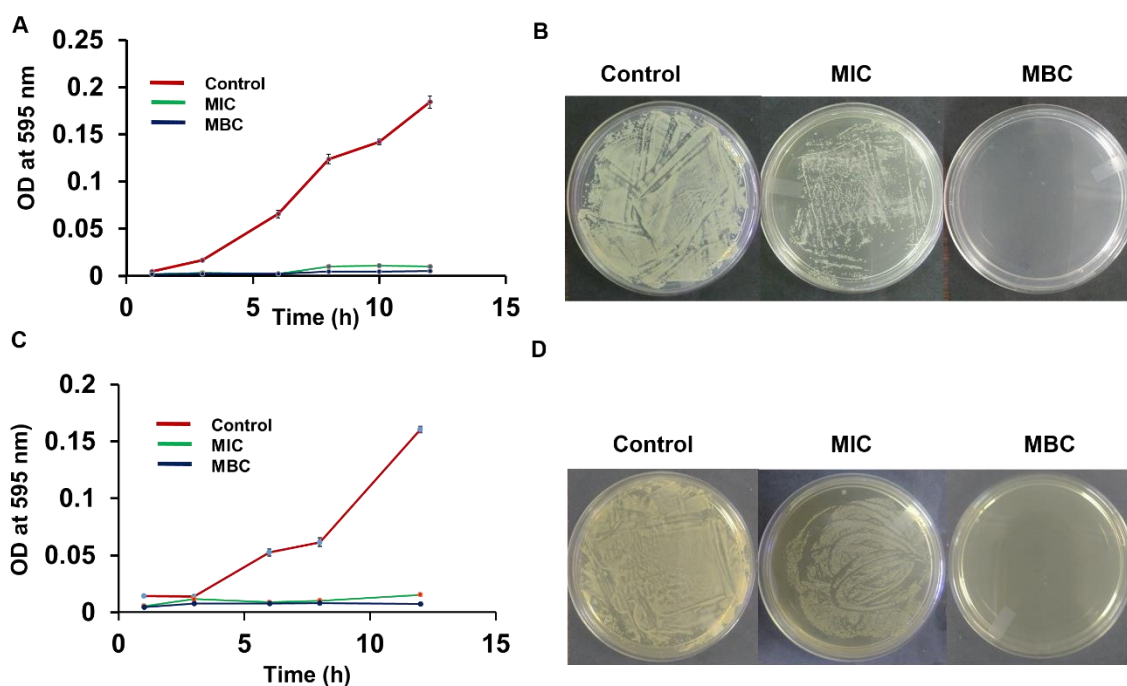

**Figure S15.** (A) Growth profile of control *E. coli*, *E. coli* after treatment with PB-Au NCs with MIC and MBC doses. (B) Respective plating images of control *E. coli*, *E. coli* after treatment with PB-Au NCs with MIC and MBC doses. (C) Growth profile of control *Staphylococcus aureus*, *Staphylococcus aureus* after treatment with PB-Au NCs with MIC and MBC doses. (D) Respective plating images of control *Staphylococcus aureus*, *Staphylococcus aureus* after treatment with PB-Au NCs with MIC and MBC doses.
